# Supplementary material
Source: PubMed Central journal article supplement (PMC4313896)
Supplement: joa0226-0022-sd1.pdf [file joa0226-0022-sd1.pdf]

Online Supplement – Ekdale and Racicot, *Anatomical evidence for low frequency sensitivity in an archaeocete whale*

Table S1. Parameters used during novel CT scanning of cetaceans considered here. Daggers (†) indicate extinct taxa.

Parameter abbreviations: Interslice – interslice spacing in  $\mu\text{m}$ ; Interpixel – interpixel spacing in  $\mu\text{m}$ , calculated as field of reconstruction / image resolution; Reconstruction – field of reconstruction in mm; Resolution – image resolution of individual CT slices in pixels; Spec No – specimen numbers. Institutional abbreviations: HSU VM – Humboldt State University, Arcata, CA; LACM – Natural History Museum Los Angeles County, Los Angeles, CA; SDNHM/SDSNH – San Diego Natural History Museum, San Diego, CA; USNM – United States National Museum of Natural History, Washington, DC.

| Taxon                                  | Spec. No.       | Interslice | Interpixel | Reconstruction | Resolution |
|----------------------------------------|-----------------|------------|------------|----------------|------------|
| <i>Balaena mysticetus</i>              | LACM 97312      | 42.70      | 29.30      | 30.0           | 1024X1024  |
| <i>Balaenoptera acutorostrata</i>      | SDNHM 23642     | 69.09      | 29.30      | 30.0           | 1024X1024  |
| Balaenopteridae†                       | SDSNH 83695     | 34.72      | 24.41      | 25.0           | 1024X1024  |
| Eschrichtiidae†                        | SDSNH 65021     | 34.72      | 24.41      | 25.0           | 1024X1024  |
| <i>Eschrichtius robustus</i> (adult)   | SDNHM 24316     | 42.70      | 29.30      | 30.0           | 1024X1024  |
| <i>Eschrichtius robustus</i> (neonate) | SDNHM 23762     | 42.70      | 29.30      | 30.0           | 1024X1024  |
| <i>Eubalaena glacialis</i>             | LACM 54763      | 34.85      | 32.23      | 33.0           | 1024X1024  |
| " <i>Megaptera</i> " <i>miocaena</i> † | USNM V 10300    | 34.85      | 24.41      | 25.0           | 1024X1024  |
| <i>Megaptera novaeangliae</i>          | HSU VM 2776     | 34.85      | 29.79      | 30.5           | 1024X1024  |
| <i>Zygorhiza kochii</i> †              | USNM PAL 214433 | 34.85      | 24.41      | 25.0           | 1024X1024  |
