# Supplementary material
Source: PubMed Central journal article supplement (PMC4313896)
Supplement: joa0226-0022-sd2.pdf [file joa0226-0022-sd2.pdf]

Online Supplement – Ekdale and Racicot, Anatomical evidence for low frequency sensitivity in an archaeocete whale

Table S2. Dimensions and shape ratios of the bony labyrinths of cetaceans. Data from the bony labyrinths of Balaenopteridae (NC) (from Pliocene of North Carolina) and *Tursiops truncatus* were taken from Ekdale (2013). Daggers (†) indicate extinct taxa.

Abbreviations: #T – number of turns completed by cochlea; %C – volumetric contribution (%) of cochlea to entire bony labyrinth, calculated as  $C_v/(C_v+V_v)$ ; 2L/C – extension (%) of secondary bony lamina within cochlear canal, calculated as  $2L/Cl$ ; 2Ll – spiral length of secondary bony lamina (mm); Ap – axial pitch of cochlea, calculated as  $Ch/\#T$  (mm); BLl – total length of bony labyrinth (mm); Br – basal (aspect) ratio of cochlear spiral, calculated as  $Ch/C_w$ ; Ch – height of cochlear spiral (mm); Cl – spiral length of cochlear canal (mm); Cra – radius of apical turn of cochlea (mm); Crb – radius of basal turn of cochlea (mm); Cs – cochlear slope, calculated as  $Ch/Cl/\#T$ ; CT – product of length of cochlear canal and number of turns, calculated as  $Cl \times \#T$ ; Cv – volume of cochlear canal ( $mm^3$ ); Cw – width of basal turn of cochlea (mm); LF – estimated low frequency limit (Hz) based on graded curvature (following Manoussaki et al., 2008); Vv – volume of vestibular system including ampullae and semicircular canals ( $mm^3$ );  $\rho$  – graded curvature of cochlea, calculated as  $Crb/Cra$ ).

| Taxon                     | BLl  | Cv  | Vv  | %Cv | #T  | 2Ll  | Cl   | Ch  | Cw   | 2L/C | CT    | Br  | Ap  | Cs   | Crb | Cra | $\rho$ | LF  |
|---------------------------|------|-----|-----|-----|-----|------|------|-----|------|------|-------|-----|-----|------|-----|-----|--------|-----|
| Basilosauridae            |      |     |     |     |     |      |      |     |      |      |       |     |     |      |     |     |        |     |
| <i>Zygorhiza kochii</i> † | 11.4 | 274 | 54  | 84% | 2.5 | 16.6 | 33.7 | 6.5 | 12.4 | 49%  | 84.3  | 0.5 | 2.6 | 0.08 | 6.0 | 0.6 | 10.0   | 8   |
| Mysticeti                 |      |     |     |     |     |      |      |     |      |      |       |     |     |      |     |     |        |     |
| <i>Balaena mysticetus</i> | 20.5 | 618 | 184 | 77% | 2.0 | 16.6 | 54.7 | 8.5 | 16.8 | 30%  | 109.4 | 0.5 | 4.3 | 0.08 | 9.0 | 1.6 | 5.6    | 107 |

Online Supplement – Ekdale and Racicot, Anatomical evidence for low frequency sensitivity in an archaeocete whale

|                                        |      |     |     |     |     |      |      |      |      |     |       |     |     |      |      |     |     |     |  |
|----------------------------------------|------|-----|-----|-----|-----|------|------|------|------|-----|-------|-----|-----|------|------|-----|-----|-----|--|
| <i>Balaenoptera acutorostrata</i>      | 16.7 | 549 | 116 | 83% | 2.5 | 31.6 | 52.9 | 9.9  | 15.1 | 60% | 132.3 | 0.7 | 4.0 | 0.07 | 8.0  | 1.1 | 7.6 | 34  |  |
| Balaenopteridae†                       | 19.0 | 535 | 106 | 83% | 2.0 | 30.1 | 51.1 | 8.1  | 17.1 | 59% | 102.2 | 0.5 | 4.1 | 0.08 | 7.8  | 0.9 | 8.7 | 18  |  |
| Balaenopteridae (NC)†                  | 19.7 | 974 | 102 | 91% | 2.4 | 32.5 | 66.9 | 12.1 | 25.0 | 49% | 160.6 | 0.5 | 5.0 | 0.08 | 10.5 | 1.2 | 8.7 | 18  |  |
| <i>Eschrichtius robustus</i> (neonate) | 20.1 | 721 | 158 | 82% | 2.2 | 31.2 | 59.6 | 11.0 | 21.1 | 52% | 131.1 | 0.5 | 5.0 | 0.08 | 9.0  | 1.3 | 6.9 | 49  |  |
| <i>Eschrichtius robustus</i> (adult)   | 20.7 | 783 | 189 | 81% | 2.1 | 36.1 | 60.9 | 9.5  | 19.1 | 59% | 127.9 | 0.5 | 4.5 | 0.07 | 8.9  | 1.3 | 6.8 | 51  |  |
| Eschrichtiidae†                        | 18.5 | 469 | 93  | 83% | 2.4 | 28.4 | 57.8 | 10.6 | 16.5 | 49% | 138.7 | 0.6 | 4.4 | 0.08 | 7.9  | 1.2 | 6.6 | 60  |  |
| <i>Eubalaena glacialis</i>             | 21.6 | 559 | 126 | 82% | 2.4 | 8.3  | 57.2 | 9.1  | 15.4 | 15% | 137.3 | 0.6 | 3.8 | 0.07 | 8.3  | 0.9 | 9.6 | 10  |  |
| "Megaptera" <i>miocaena</i> †          | 17.4 | 424 | 111 | 79% | 2.7 | 18.2 | 57.9 | 9.6  | 14.7 | 31% | 156.3 | 0.7 | 3.6 | 0.06 | 7.6  | 1.0 | 7.6 | 33  |  |
| <i>Megaptera novaeangliae</i>          | 20.0 | 936 | 175 | 84% | 2.2 | 35.3 | 57.6 | 9.2  | 18.0 | 61% | 126.7 | 0.5 | 4.2 | 0.07 | 9.5  | 1.3 | 7.3 | 39  |  |
| Odontoceti                             |      |     |     |     |     |      |      |      |      |     |       |     |     |      |      |     |     |     |  |
| <i>Tursiops truncatus</i>              | 10.1 | 146 | 20  | 88% | 1.7 | 30.6 | 35.0 | 6.2  | 13.3 | 87% | 59.5  | 0.5 | 3.6 | 0.10 | 5.5  | 1.2 | 4.6 | 187 |  |
