# Supplementary material
Source: PubMed Central journal article supplement (PMC4313896)
Supplement: joa0226-0022-sd4.pdf [file joa0226-0022-sd4.pdf]

Online Supplement – Ekdale and Racicot, Anatomical evidence for low frequency sensitivity in an archaeocete whale

Table S4. Dimensions and orientations of anterior (A), lateral (L), and posterior semicircular canals (P). Canal arc radii and lengths expressed in mm, and  $90_{\text{var}}$  refers to average deviation of canal pair angles ( $90_{\text{A-L}}$ ,  $90_{\text{A-P}}$ ,  $90_{\text{L-P}}$ ) and expressed in degrees. Data from the bony labyrinths of Balaenopteridae (NC)† (from Pliocene of North Carolina) and *Tursiops truncatus* were taken from Ekdale (2013). Daggers (†) indicate extinct taxa.

| Taxon                                  | <u>Canal Radii</u> |     |     |     | <u>Canal Lengths</u> |      |      | <u>Canal Angles</u> |      |      | <u>Canal Deviations</u> |                   |                   |                   |  |
|----------------------------------------|--------------------|-----|-----|-----|----------------------|------|------|---------------------|------|------|-------------------------|-------------------|-------------------|-------------------|--|
|                                        | A                  | L   | P   | Ave | A                    | L    | P    | A-L                 | A-P  | L-P  | $90_{\text{A-L}}$       | $90_{\text{A-P}}$ | $90_{\text{L-P}}$ | $90_{\text{var}}$ |  |
| Basilosauridae                         |                    |     |     |     |                      |      |      |                     |      |      |                         |                   |                   |                   |  |
| <i>Zygorhiza kochii</i> †              | 2.2                | 2.2 | 1.6 | 2.0 | 8.9                  | 7.4  | 8.4  | 99.4                | 92.0 | 87.7 | 9.4                     | 2.0               | 2.3               | 4.6               |  |
| Mysticeti                              |                    |     |     |     |                      |      |      |                     |      |      |                         |                   |                   |                   |  |
| <i>Balaena mysticetus</i>              | 2.7                | 2.6 | 2.5 | 2.6 | 12.2                 | 10.1 | 11.9 | 86.2                | 92.5 | 98.0 | 3.8                     | 2.5               | 8.0               | 4.8               |  |
| <i>Balaenoptera acutorostrata</i>      | 2.1                | 1.9 | 1.8 | 1.9 | 8.0                  | 5.7  | 7.7  | 75.6                | 113  | 78.9 | 14.4                    | 23.0              | 11.1              | 16.2              |  |
| Balaenopteridae†                       | 2.5                | 2.4 | 1.9 | 2.3 | 10.4                 | 8.6  | 8.5  | 78.5                | 99.9 | 79.4 | 11.5                    | 9.9               | 10.6              | 10.7              |  |
| Balaenopteridae (NC)†                  | 2.6                | 2.2 | 2.0 | 2.3 | 10.7                 | 9.5  | 8.5  | 71.6                | 105  | 75.6 | 18.4                    | 15.0              | 14.4              | 15.9              |  |
| <i>Eschrichtius robustus</i> (neonate) | 2.5                | 2.0 | 1.8 | 2.1 | 7.9                  | 8.6  | 8.4  | 70.6                | 101  | 71.5 | 19.4                    | 11.0              | 18.5              | 16.3              |  |
| <i>Eschrichtius robustus</i> (adult)   | 2.5                | 2.0 | 2.1 | 2.2 | 9.1                  | 7.0  | 8.5  | 73.5                | 99.6 | 75.5 | 16.5                    | 9.6               | 14.5              | 13.5              |  |

Online Supplement – Ekdale and Racicot, Anatomical evidence for low frequency sensitivity in an archaeocete whale

|                                         |     |     |     |     |      |      |      |      |      |      |      |      |      |      |
|-----------------------------------------|-----|-----|-----|-----|------|------|------|------|------|------|------|------|------|------|
| <i>Eschrichtiidae</i> †                 | 2.7 | 2.2 | 1.9 | 2.3 | 11.1 | 8.4  | 9.1  | 70.8 | 109  | 79.7 | 19.2 | 19.0 | 10.3 | 16.2 |
| <i>Eubalaena glacialis</i>              | 3.8 | 2.8 | 3.1 | 3.2 | 17.4 | 11.9 | 14.9 | 74.8 | 97.4 | 94.3 | 15.2 | 7.4  | 4.3  | 9.0  |
| <i>"Megaptera"</i><br><i>miocaena</i> † | 2.8 | 2.2 | 2.5 | 2.5 | 11.8 | 7.3  | 11.2 | 101  | 103  | 94.0 | 11.0 | 13.0 | 4.0  | 9.3  |
| <i>Megaptera</i><br><i>novaeangliae</i> | 2.7 | 2.3 | 2.1 | 2.4 | 11.5 | 8.6  | 9.4  | 66.0 | 98.0 | 77.0 | 24.0 | 8.0  | 13.0 | 15.0 |
| Odontoceti                              |     |     |     |     |      |      |      |      |      |      |      |      |      |      |
| <i>Tursiops truncatus</i>               | 1.2 | 1.4 | 0.8 | 1.1 | 3.8  | 4.4  | 4.0  | 75.0 | 97.6 | 88.9 | 15.0 | 7.6  | 1.1  | 7.9  |
